# Supplementary material for: Acid-base transporters and pH dynamics in human breast carcinomas predict proliferative activity, metastasis, and survival
Source: eLife. 2021 Jul 5;10:e68447. doi: 10.7554/eLife.68447 (PMC8282339; doi:10.7554/eLife.68447)
Supplement: Figure 1—figure supplement 1—source data 1. — Note that this source data file pertains to Figure 1—figure supplement 1 but it also contains the clinicopathological information used for stratification in Figure 2—figure supplements 1 and 2, Figure 3—figure supplement 1, Figure 4—figure supplement 1, Figure 5—figure supplement 1, Figure 7—figure supplement 1, and Figure 8—figure supplement 1. [file elife-68447-fig1-figsupp1-data1.xlsx]

## Sheet: Ark1
																			Normal tissue with CO2/HCO3–								Normal tissue CO2/HCO3–-free								Cancer tissue with CO2/HCO3–								Cancer tissue CO2/HCO3–-free
No	Histological type	Tumor size (mm)	ER status (fraction of positive cells)	HER2 (0=normal, 1=overexpression/gene amplification)	Axillary lymph node status (0=negative, 1=metastasis detected)	Ki67 (fraction of positive cells)	Malignancy grade	Age (<45 years)	Age (45-49 years)	Age (50-54 years)	Age (55-59 years)	Age (60-64 years)	Age (65-69 years)	Age (70-74 years)	Age (75-79 years)	Age (>79 years)	Investigator		pHi 1	Net acid extrusion 1 (mM/min)	pHi 2	Net acid extrusion 2 (mM/min)	pHi 3	Net acid extrusion 3 (mM/min)	pHi 4	Net acid extrusion 4 (mM/min)	pHi 1	Net acid extrusion 1 (mM/min)	pHi 2	Net acid extrusion 2 (mM/min)	pHi 3	Net acid extrusion 3 (mM/min)	pHi 4	Net acid extrusion 4 (mM/min)	pHi 1	Net acid extrusion 1 (mM/min)	pHi 2	Net acid extrusion 2 (mM/min)	pHi 3	Net acid extrusion 3 (mM/min)	pHi 4	Net acid extrusion 4 (mM/min)	pHi 1	Net acid extrusion 1 (mM/min)	pHi 2	Net acid extrusion 2 (mM/min)	pHi 3	Net acid extrusion 3 (mM/min)	pHi 4
1	Ductal carcinoma	22	1	0	1	0.1	1								x		1		6.38283	68.8024	6.61947	26.0268	6.76193	12.1979	6.8596	7.63913	6.39147	72.2623	6.61469	16.615	6.71103	6.05132	6.76201	3.32386	6.50613	45.5926	6.68106	12.3465	6.7641	6.50785	6.82308	4.63309	6.76677	51.6141	7.34562	6.06142	7.58277	0.525935	7.6606
2	Lobular carcinoma	19	1	0	0	0.02	1								x		1		6.58169	54.7885	6.83868	16.7758	6.95943	7.63936	7.02045	3.98361	6.68182	50.8626	6.92414	6.05761	6.98523	1.38748	6.99233	0.425163									6.46618	13.429	6.54267	8.844	6.61098	7.37756	6.65574
3	Ductal carcinoma	22	1	1	1	0.4	2									x	1		6.12321	1.68328	6.12911	2.59904	6.13374	2.33494	6.13638	1.00603	6.17645	5.21684	6.18892	1.52623	6.19519	1.17208	6.20126	2.61871	6.82728	9.41524	6.89892	3.30546	6.9399	2.72515	6.96264	1.65743	6.41708	9.65075	6.46253	7.6385	6.49378	3.80201	6.52316
5	Ductal carcinoma	18	1	1	0	0.2	1		x								1		6.48122	62.3373	6.74645	18.5744	6.86402	7.80983	6.92434	4.22471	6.44389	18.6331	6.53415	11.5043	6.59457	6.23046	6.63662	4.57602									6.43137	13.7528	6.48708	6.10218	6.52594	5.74003	6.55173
6	Lobular carcinoma	34	1	0	1	0.05	1						x				1		6.20981	9.72014	6.23343	7.4003	6.25166	6.0141	6.27087	4.72688									6.51795	58.9768	6.7892	16.6663	6.92368	9.66479	7.01492	8.05626	6.5392	36.0022	6.71661	9.64679	6.79934	3.84986	6.84558
7	Ductal carcinoma	20	0.02	0	0	0.9	3					x					1		6.48262	32.7842	6.60861	9.13579	6.6544	5.10646	6.68657	2.84282	6.48244	53.1705	6.69317	11.9435	6.77344	3.83836	6.81094	2.55707	6.95723	16.0154	7.13268	13.8928	7.26885	11.8841	7.37824	11.6314	6.95213	5.65697	7.06017	2.39165	7.11912	1.54578	7.15627
8	Ductal carcinoma	9	1	0	0	0.2	1								x		1		6.72057	30.2544	6.96852	19.4925	7.13776	12.2545	7.23064	8.66495	6.24411	25.4051	6.31797	16.3779	6.37221	10.6874	6.41266	6.26116	6.42841	18.4034	6.52034	13.3372	6.59115	8.42068	6.64936	6.6385	6.44102	32.4458	6.60704	17.0594	6.74383	9.72013	6.85879
9	Ductal carcinoma	11	1	0	0	0.35	2			x							1		6.2362	44.2334	6.36787	22.2572	6.43945	13.4184	6.49276	8.8613									6.78319	12.6351	6.91946	11.016	7.02182	7.16737	7.09597	4.36641	6.5727	49.9017	6.81384	8.4049	6.895	2.81028	6.93056
10	Lobular carcinoma	18	1	0	0	0.2	1						x				1		6.60599	67.5079	6.84384	11.1518	6.92821	6.59622	6.97595	4.10304	6.24025	26.206	6.30998	16.3685	6.36188	10.7552	6.40055	7.41822	6.7954	28.6628	7.01718	14.8771	7.16276	10.5438	7.26561	8.16103	6.44899	37.1474	6.62689	12.878	6.71947	5.29756	6.76963
11	Ductal carcinoma	20	1	0	0	0.2	1							x			1		6.25062	41.5594	6.37116	23.0587	6.45626	13.0713	6.52304	9.08839									6.70305	41.3567	6.93459	11.043	7.04553	9.09416	7.14721	7.74619
12	Mucinous adenocarcinoma	17	1	0	0	0.15										x	1		6.26322	58.6196	6.41049	26.6541	6.52262	15.1302	6.60262	11.8968	6.28852	52.3038	6.42906	19.3739	6.51386	9.65355	6.57186	6.24558	6.93757	20.9353	7.42468	24.0738	7.65012	21.8109	7.77632	17.8391	6.64746	49.7138	6.98157	9.1002	7.15048	3.34495	7.24436
13	Lobular carcinoma	30	0.9	0	0	0.6	3								x		1		6.27421	53.7319	6.43837	27.1043	6.55113	14.0063	6.62914	8.47822	6.21009	15.8281	6.25472	12.6339	6.29534	9.46594	6.33204	9.9227	6.4637	41.3305	6.63314	15.3948	6.73078	9.13296	6.80038	5.82128	6.42795	19.3236	6.5078	9.26809	6.55845	5.28495	6.59046
14	Mucinous adenocarcinoma	19	1	0	0	0.15									x		1		6.73627	74.8904	7.07301	14.3042	7.16834	6.18332	7.21154	2.99771	6.44727	76.1446	6.72504	14.9857	6.8388	5.60999	6.89321	2.67765	6.70983	9.19746	6.78208	5.52421	6.82513	4.16021	6.86057	2.82294	6.50737	29.0794	6.63777	10.1774	6.71654	5.56609	6.77312
15	Lobular carcinoma	15	1	1	0	0.1	2									x	1		6.39554	36.3342	6.54087	17.8145	6.62461	7.94234	6.67843	5.29489	6.38106	65.3907	6.63322	22.6913	6.77695	9.31279	6.8619	5.4082	6.71288	49.7291	7.03437	16.6568	7.18789	11.2558	7.28976	10.7103	6.43159	19.3975	6.50942	8.00388	6.55717	4.25078	6.58761
16	Ductal carcinoma	17	1	0	0	0.25	2								x		1										6.53938	47.6356	6.75648	11.3186	6.84684	4.13034	6.89026	2.44492	6.63827	25.2273	6.81197	13.9998	6.94686	8.19016	7.08861	9.60753	6.70012	12.2322	6.83192	8.47241	6.94407	4.55452	7.02316
17	Ductal carcinoma	40	1	0	0	0.3	2				x						1		6.38389	14.1715	6.45248	14.254	6.51357	8.98939	6.57442	7.92887	6.29599	71.9136	6.50434	24.9099	6.62552	11.7013	6.70605	6.63594	6.59941	45.7881	6.86131	17.0734	6.97407	5.44191	7.0361	3.87161	6.42683	13.584	6.50224	9.82318	6.5528	6.31387	6.59208
19	Tubulolobular carcinoma	27	1	0	1	0.15	1					x					1		6.25868	49.5892	6.39992	22.6808	6.48424	11.4604	6.53359	6.6031	6.40042	56.1361	6.60532	19.3322	6.71905	7.74716	6.78102	3.60666	6.49208	41.3051	6.72028	19.3563	6.85251	9.12341	6.92502	5.26846	6.67337	8.77611	6.75281	6.55462	6.83461	5.06159	6.91142
20	Lobular carcinoma	36	1	0	0	0.05	1		x								1		6.65208	40.422	6.86065	13.0941	6.95318	4.53865	7.00097	2.6603	6.43857	30.7571	6.56218	12.6816	6.6248	5.66964	6.66136	2.69642	6.94372	17.7172	7.13058	13.3776	7.2435	7.89259	7.30922	5.30338	6.80476	13.9607	6.97269	5.59832	7.06309	1.99121	7.10885
21	Mucinous adenocarcinoma	16	1	0	0	0.05										x	1		6.43994	79.627	6.68594	15.8387	6.77058	7.03005	6.80577	2.01537	6.43599	13.8061	6.51344	11.8896	6.58261	6.84857	6.62994	5.44751	6.64898	16.1675	6.75787	9.74503	6.83656	5.42643	6.90156	5.87958	6.50487	28.8109	6.65946	12.2644	6.75882	5.82936	6.81951
22	Ductal carcinoma	19	1	0	1	0.05	2						x				1		6.63531	31.5993	6.67156	-0.321311	6.69631	6.18292	6.76475	7.37746	6.49549	31.9545	6.68142	15.9224	6.78588	5.18773	6.83076	2.33301	6.75445	45.8906	7.06424	13.4044	7.18262	8.89349	7.25338	4.56004	6.62411	53.4843	6.89287	6.89066	6.96989	1.96267	6.99799
23	Ductal carcinoma	12	0	0	0	0.25	2				x						1		6.36024	73.2625	6.56263	17.0872	6.64008	8.28743	6.67919	4.10224	6.27668	40.5112	6.37423	13.6784	6.42752	8.89159	6.4605	4.97789	6.55193	66.4321	6.92667	25.958	7.15095	14.7777	7.25911	8.31186	6.80158	15.1978	6.93144	4.19273	6.99891	2.19139	7.04542
24	Ductal carcinoma	14	1	0	0	0.35	2					x					1		6.61041	64.2943	6.86107	12.4157	6.93609	4.64005	6.96963	1.52539	6.48292	72.8935	6.73355	12.1909	6.81471	3.45242	6.85132	1.48041
25	Ductal carcinoma	21	1	0	0	0.1	1							x			1		6.3797	57.0394	6.63791	24.8826	6.76082	7.81348	6.80184	2.93661	6.32123	73.1035	6.55539	21.9797	6.67219	8.60244	6.73345	3.94309	6.45819	32.5389	6.60251	16.839	6.70093	8.76006	6.76452	5.16899	6.46508	40.6314	6.66215	15.8791	6.78675	7.43353	6.87575
26	Ductal carcinoma	15	1	0	1	0.25	2								x		1		6.57329	46.7575	6.76858	13.5702	6.86861	6.69398	6.92925	4.52184	6.34712	70.0029	6.5441	17.6914	6.63725	8.2104	6.69228	4.27544
27	Ductal carcinoma	17	1	0	1	0.15	1							x			1		6.31999	54.165	6.42478	16.1009	6.4866	9.47347	6.53564	6.25957	6.42274	20.2153	6.52091	12.1464	6.58782	6.68703	6.62839	4.41085	6.49719	66.4411	6.72857	11.7547	6.80614	5.17237	6.83905	2.45404	6.7555	12.5291	6.91274	6.91154	7.01446	3.85727	7.09031
28	Ductal carcinoma	32	1	1	0	0.3	2					x					1																		6.7546	84.119	7.30772	21.1102	7.40879	4.59795	7.42455	-0.992537	6.66137	68.2446	6.9762	5.56146	7.06293	1.96234	7.09311
30	Ductal carcinoma	13	1	0	0	0.05	2				x						1		6.42338	10.4752	6.46381	4.80284	6.49298	5.02211	6.51731	4.49151	6.2557	30.08	6.33427	11.8268	6.37295	6.17019	6.40041	3.26083	6.53637	9.16192	6.60301	9.16528	6.65537	5.77108	6.69691	3.89852	6.41484	12.1437	6.47232	8.37626	6.51674	5.06442	6.55355
31	Ductal carcinoma	15	1	0	0	0.05	2						x				1		6.45607	72.337	6.71813	18.2569	6.83567	8.09248	6.89924	5.0863	6.51072	14.7584	6.61181	11.2623	6.703	7.68259	6.77319	4.90278	6.51809	46.8147	6.72358	14.9192	6.81692	6.1952	6.87221	2.80346	6.65391	33.6318	6.90155	8.93969	7.01454	3.16483	7.07366
36	Ductal carcinoma	17	1	0	0	0.1	2			x							1		6.73323	73.3095	7.1068	15.0314	7.20369	5.5728	7.24068	1.25	6.60266	36.7698	6.82663	13.1478	6.96384	5.86621	7.0595	4.06916	6.5448	12.7081	6.6594	13.8993	6.76099	8.48458	6.82347	4.16136	6.61998	43.4647	6.84434	8.54193	6.92799	2.81503	6.97413
37	Ductal carcinoma	20	0.03	0	0	0.9	3									x	1		6.35431	64.5202	6.54384	20.6023	6.63066	6.71062	6.67229	3.90337	6.49892	86.3798	6.90125	12.2088	7.01637	3.05043	7.05622	0.278303	6.50944	44.4482	6.68748	11.2979	6.75577	6.15739	6.79721	3.01267	6.73149	12.6736	6.87183	6.89126	6.95823	3.7602	7.03039
39	Ductal carcinoma	12	1	0	0	0.25	2								x		1										6.26465	40.3883	6.35882	17.7638	6.41497	8.76339	6.44818	4.98435	6.58184	19.934	6.70654	11.9799	6.79473	7.34686	6.86247	4.62903	6.72891	5.35486	6.78216	3.39206	6.82835	2.68821	6.85636
40	Ductal carcinoma	12	1	0	0	0.15	2			x							1		6.33973	38.4835	6.50682	25.7636	6.62796	13.0306	6.70843	8.83314	6.566	44.6818	6.71162	6.70014	6.77225	4.47198	6.82053	2.89518	6.45846	29.1117	6.58856	13.3852	6.6696	7.92756	6.73167	6.53355	6.81744	15.3361	6.98364	4.38053	7.06928	2.04593	7.11767
41	Ductal carcinoma	17	1	1	0	0.1	2					x					1
46	Ductal carcinoma	18	1	0	0	0.25	2	x									1		6.3303	66.0705	6.50693	16.7314	6.59346	13.7359	6.64897	5.39504	6.27738	45.9904	6.45222	27.7796	6.59035	14.7957	6.64961	6.79139	6.73067	8.21752	6.82195	7.65583	6.89323	4.81956	6.93514	3.70386	6.69682	19.5007	6.86578	7.6897	6.9592	2.90215	7.01351
47	Ductal carcinoma	31	1	0	0	0.2	3							x			1		6.65175	1.67653	6.66765	2.62734	6.69792	4.4995	6.73137	3.16685	6.2257	19.9432	6.27762	10.9447	6.31571	8.58237	6.3448	7.6638	6.55306	43.9049	6.76699	15.4182	6.88076	8.01884	6.95234	5.44101	6.46557	32.5377	6.6254	12.6969	6.71904	6.25632	6.77607
49	Ductal carcinoma	23	0.95	0	1	0.25	2		x								1		6.25019	26.897	6.32424	16.7279	6.38378	9.1197	6.44472	11.1844									6.66215	51.466	6.94614	14.3333	7.06625	7.46933	7.13705	5.93109	6.72184	20.1188	6.90789	5.8668	7.01916	3.22417	7.07859
50	Ductal carcinoma	7	1	0	0	0.3	2						x				1		6.27362	50.5823	6.44157	24.8454	6.53398	10.1596	6.57656	6.51325	6.23324	25.4013	6.30361	13.4766	6.34589	5.27325	6.38217	5.45518	6.74606	26.515	6.78337	0.355354	6.86425	8.96223	6.95121	6.39773	6.49764	30.8039	6.66046	12.1623	6.77493	7.3057	6.86324
52	Ductal carcinoma	12	0.95	0	0	0.3	2						x				1										6.60299	22.8674	6.75537	8.96443	6.82471	3.57674	6.85978	1.45153
53	Ductal carcinoma	12	1	0	0	0.25	2					x					1		6.21484	14.1265	6.2718	9.74203	6.31437	10.3673	6.34621	5.04323	6.26036	42.266	6.36359	16.6545	6.42918	9.83531	6.46962	5.67032	6.46198	35.7809	6.70444	27.3853	6.89807	13.0077	7.01341	7.819	6.68935	18.7441	6.87688	9.39226	6.9729	4.27311	7.03727
54	Ductal carcinoma	12	1	0	0	0.4	2						x				1		6.38912	97.214	6.72601	22.6133	6.85292	7.4224	6.89589	1.58215	6.53387	55.9881	6.76386	12.2223	6.85052	5.33894	6.89964	2.38001	6.87985	12.0493	7.02128	11.7481	7.14186	9.65235	7.22015	7.84204	6.63999	17.8796	6.79704	8.74737	6.89529	3.68564	6.96635
55	Ductal carcinoma	9	0	0	0	0.9	3			x							1		6.39823	69.1549	6.65718	17.7283	6.73973	6.44754	6.77142	2.72496	6.58048	36.0431	6.78917	13.4187	6.91655	5.07187	6.99649	2.86068	6.66683	31.8067	6.92164	20.0941	7.11452	10.8989	7.23019	7.57453	6.60909	28.8136	6.84976	11.5873	6.99523	4.82302	7.06718
56	Ductal carcinoma	29	1	0	1	0.2	2				x						1		6.48287	9.64729	6.53729	4.49851	6.5838	7.51195	6.61884	5.744	6.26718	38.3506	6.35915	17.4769	6.4273	9.01761	6.47896	5.41903	6.5907	17.0366	6.7053	10.603	6.77453	5.27633	6.83382	4.82888	6.44712	20.3666	6.54561	8.78146	6.61173	5.22453	6.66081
57	Ductal carcinoma	24	1	0	1	0.3	2				x						1		6.4581	108.541	6.97478	31.7592	7.16708	9.98038	7.21541	2.04831	6.71071	34.5912	6.97971	8.31223	7.08147	1.93051	7.11344	0.751585	6.4689	41.7329	6.67404	16.7406	6.80306	9.82307	6.89118	6.74675	6.47081	25.9741	6.641	17.0853	6.79409	9.79639	6.90382
58	Ductal carcinoma	28	1	1	1	0.5	3				x						1		6.31986	29.2024	6.40913	12.9383	6.46344	7.4035	6.50148	5.99194	6.23649	21.6935	6.31313	21.0748	6.38736	13.6228	6.43034	9.9122	6.84748	9.092	6.92973	5.78663	7.00068	5.26998	7.04523	4.02558	6.77757	13.4894	6.93846	6.4876	7.02854	2.33496	7.07726
59	Ductal carcinoma	14	1	0	0	0.1	1					x					1		6.30379	66.7128	6.47854	18.2031	6.54896	8.66849	6.5903	8.20496	6.27266	38.818	6.37984	19.582	6.45734	8.50859	6.50932	4.44216	6.53628	46.7818	6.81015	19.6188	6.95593	9.42873	7.04469	7.49822
62	Ductal carcinoma	15	1	1	0	0.4	3	x									1		6.2542	62.1453	6.39887	24.1093	6.47808	9.60887	6.52807	5.84263	6.22115	18.8864	6.28138	19.4236	6.34366	10.9956	6.39597	10.011	6.72077	16.8624	6.87609	13.2701	7.01899	12.2025	7.1315	8.66718	6.4894	14.4528	6.57771	12.8004	6.66537	8.56439	6.74509
66	Ductal carcinoma	100	1	0	1	0.1	2									x	1		6.45515	43.6345	6.69664	25.4795	6.83504	13.4176	6.9123	5.86547	6.24485	34.9826	6.35893	20.6981	6.43016	10.2901	6.4806	7.14702	6.45514	26.9208	6.59056	19.2843	6.68639	8.46637	6.7673	5.20703
67	Mucinous adenocarcinoma	17	0.1	0	0	0.2								x			1		6.24636	28.5252	6.32616	15.532	6.37363	10.3841	6.40611	4.1907	6.26567	35.4967	6.37203	23.0461	6.45199	14.3418	6.50739	9.08696	6.72253	15.5342	6.84751	7.91484	6.93937	5.9415	7.00779	6.82438	6.71833	4.00614	6.76687	2.98252	6.80226	3.75748	6.83398
68	Ductal carcinoma	15	1	0	0	0.05	1					x					1		6.3793	65.3578	6.56644	18.6273	6.65311	6.75291	6.68267	3.02613	6.35972	39.1124	6.55106	21.6449	6.64465	8.33735	6.71	3.94828									6.56865	45.1117	6.77759	6.83204	6.85789	3.45575	6.88969
70	Ductal carcinoma	40	0.95	0	0	0.2	2						x				1		6.28835	29.8282	6.40662	27.4373	6.5054	11.7008	6.57025	8.56153	6.26647	66.7246	6.44463	22.5733	6.54126	11.6309	6.6142	5.31425	6.65147	42.8835	6.94476	18.3496	7.10409	8.52958	7.19045	5.47019	6.55049	33.3446	6.74454	11.5533	6.87343	4.4774	6.97504
71	Ductal carcinoma	25	1	1	1	0.3	2				x						1		6.28931	58.701	6.44842	24.8303	6.54209	15.7689	6.61834	7.86378	6.23649	21.6935	6.31313	21.0748	6.38736	13.6228	6.43034	9.9122	6.52428	40.1308	6.70198	16.8469	6.81612	10.565	6.86927	4.58668	6.73083	35.5049	7.02254	7.42665	7.17841	2.40325	7.26036
72	Ductal carcinoma	18	1	0	0	0.1	2							x			1																		6.76012	29.9304	6.99898	16.2473	7.17236	13.381	7.28946	11.9571	6.48136	28.5513	6.6507	17.1562	6.76712	10.0163	6.85287
73	Ductal carcinoma	16	1	1	0	0.6	3	x									1		6.48634	29.875	6.62182	13.4461	6.70585	7.28443	6.75778	3.85542	6.3	81.7759	6.60276	32.8107	6.79061	11.6919	6.88788	5.57508	6.71591	35.4871	6.94781	11.7112	7.05729	6.00939	7.12319	3.67071	6.70409	45.2744	7.03143	7.53654	7.18186	1.96835	7.2577
74	Ductal carcinoma	50	1	0	1	0.35	2		x								1		6.52683	91.3627	6.87475	14.9367	6.97261	3.94821	7.02471	2.13024	6.49918	41.4968	6.66725	12.0603	6.76634	6.93405	6.82476	3.74169	6.75373	33.0851	7.01423	16.156	7.16656	9.34359	7.26466	6.96802	6.4771	23.5751	6.57893	12.2536	6.64415	4.94369	6.68877
76	Ductal carcinoma	18	1	0	0	0.1	1							x			1																		6.50469	37.0856	6.74057	24.9811	6.95852	16.9755	7.12753	13.1306	6.60404	20.2468	6.77401	11.3391	6.88609	5.23519	6.95568
77	Ductal carcinoma	15	0.95	0	1	0.15	2	x									1		6.3442	96.5146	6.74829	35.9629	6.95657	13.6329	7.06694	7.83756	6.44778	22.3046	6.56494	16.7827	6.65981	9.7584	6.72812	4.50862	6.62853	60.5383	6.90044	11.9652	7.01248	2.71467	7.06254	3.05887	6.45205	34.7945	6.63618	16.1925	6.76626	7.99714	6.85341
81	Ductal carcinoma	27	0	0	0	0.2	2									x	2																										6.51316	5.3766	6.55533	6.30332	6.60069	5.58441	6.65209
82	Ductal carcinoma	21	1	0	1	0.4	3								x		2																		6.62264	29.1795	6.68537	4.01905	6.72684	10.7687	6.77718	7.20221	6.41875	8.59774	6.46961	6.37452	6.5099	4.92669	6.54238
83	Ductal carcinoma	23	0	0	1	0.2	3					x					2																		6.84841	30.0072	7.00083	18.1507	7.10855	14.4248	7.17874	8.5852
84	Ductal carcinoma	34	0.9	1	0	0.4	2								x		2																		6.70837	26.2853	6.81373	14.3272	6.88037	9.36176	6.93242	9.5279	6.5506	14.7912	6.60942	12.1376	6.66557	11.0983	6.70518
85	Ductal carcinoma	15	0.95	1	0	0.4	3				x						2																										6.7666	11.4496	6.8292	7.63733	6.8683	4.25521	6.90344
86	Ductal carcinoma	30	1	0	0	0.5	3								x		2																		6.5967	3.94461	6.65091	2.42317	6.66464	5.23499	6.72357	2.19641	6.50991	25.7416	6.59245	19.2268	6.6596	11.3895	6.70923
87	Lobular carcinoma	50	1	0	0	0.15	1						x				2																		6.43813	28.5005	6.51695	17.7571	6.56575	10.291	6.59758	6.39305	6.66259	15.4985	6.73268	10.8603	6.78018	6.53436	6.81009
88	Ductal carcinoma	25	1	0	1	0.15	1				x						2																		6.78467	24.3829	6.89422	13.556	6.96488	9.62335	7.01883	6.87074
89	Ductal carcinoma	30	1	0	0	0.1	1			x							2																		6.41424	26.8592	6.49077	21.0332	6.56349	17.1466	6.63162	14.3646
90	Ductal carcinoma	7	1	0	1	0.25	1							x			2																		6.60361	32.8478	6.70786	14.3884	6.7633	6.6061	6.80382	5.52576	6.1365	8.20527	6.17732	6.14014	6.21312	4.69586	6.23745
91	Lobular carcinoma	44	1	0	1	0.1	2								x		2																		6.62551	46.1028	6.75099	10.3096	6.79466	8.06085	6.80958	0.841659	6.44586	24.5959	6.51596	15.8139	6.56407	9.5896	6.59336
92	Ductal carcinoma	16	1	0	1	0.15	2					x					2																		6.47137	58.2917	6.63853	28.0844	6.74405	16.2849	6.81712	10.4661	6.41515	19.3294	6.471	11.5384	6.50677	6.12903	6.52912
93	Ductal carcinoma	27	0.9	0	1	0.4	1		x								2																		6.45413	32.7864	6.53559	22.8585	6.61343	14.0174	6.67252	9.21969	6.80284	14.078	6.92139	15.0181	7.02611	6.47509	7.10737
94	Ductal carcinoma	12	1	0	0	0.15	2		x								2																		6.43636	13.6204	6.50108	6.26778	6.53435	3.48268	6.5573	2.15184	6.3351	17.5392	6.42315	4.75206	6.45099	1.53601	6.45818
95	Ductal carcinoma	14	0.95	1	0	0.2	1							x			2																		6.4381	8.27087	6.4937	3.78036	6.52468	2.28943	6.54125	0.41678	6.50164	29.4092	6.60252	18.5231	6.67686	11.6579	6.72846
96	Ductal carcinoma	26	1	0	1	0.2	1				x						2																		6.4407	41.6351	6.54354	20.0462	6.60331	12.731	6.6429	6.84292	6.4436	5.8453	6.47477	3.29453	6.51558	3.36058	6.54987
97	Ductal carcinoma	14	1	0	1	0.2	1				x						2																		6.42367	18.0348	6.47685	15.0699	6.51974	9.49523	6.55349	8.48355	6.88656	6.87242	6.94002	5.33585	6.98893	4.83208	7.03057
98	Ductal carcinoma	15	1	0	1	0.85	3							x			2																		6.43477	30.4832	6.52066	19.6864	6.58843	13.8929	6.63668	8.84068	6.40502	7.88149	6.4305	7.13043	6.4555	5.58235	6.47405
99	Ductal carcinoma	21	0.95	0	1	0.4	3	x									2																		6.45759	73.6162	6.63994	27.4605	6.74467	16.4087	6.81758	11.5262	6.60518	23.5081	6.68949	11.4342	6.73569	5.63063	6.7618
100	Ductal carcinoma	22	1	0	1	0.3	2					x					2																		6.45168	42.1571	6.56103	19.6773	6.62803	12.8868	6.67396	8.48502	6.41725	13.4221	6.45867	9.62109	6.49051	8.92547	6.51734
101	Ductal carcinoma	25	0.95	0	1	0.1	2			x							2																		6.80281	32.0545	6.93444	11.2556	6.98883	6.68032	7.02876	4.56451	6.83873	11.6585	6.90528	6.07128	6.94769	3.72504	6.97066
102	Ductal carcinoma	26	1	0	1	0.2	2	x									2																		6.85662	10.453	6.91527	9.48076	6.97308	8.47285	7.02413	7.48822	6.66709	4.1527	6.70823	1.46616	6.72866	0.715842	6.73767
103	Ductal carcinoma	19	0.95	0	1	0.2	2						x				2																		6.46342	45.9886	6.56962	18.3631	6.63002	10.3506	6.67302	6.73855	6.2336	11.1717	6.31543	6.12921	6.36712	3.55617	6.40045
104	Ductal carcinoma	14	1	0	0	0.6	3						x				2																		6.54694	101.416	6.80077	25.3554	6.89901	10.1261	6.95259	5.73922	6.49781	47.561	6.65522	22.9407	6.72572	6.82943	6.74962
106	Lobular carcinoma	18	1	0	0	0.05	1									x	2																		6.45162	38.7701	6.5521	20.4259	6.6167	11.6302	6.66004	7.56421	6.44269	33.4503	6.51445	11.02	6.54607	5.11288	6.5621
107	Mucinous adenocarcinoma	26	1	0	0	0.2	1			x							2																		6.68117	56.704	6.87226	19.1462	6.9652	12.7344	7.02615	6.48292	6.42339	25.4522	6.49208	16.9667	6.55051	13.1153	6.59904
108	Ductal carcinoma	30	1	0	0	0.2	2								x		2																		6.46028	18.8447	6.52657	18.3933	6.58921	9.72324	6.62184	5.24172	6.36309	13.806	6.41456	5.11455	6.44164	2.59444	6.45648
109	Ductal carcinoma	14	1	0	0	0.3	2								x		2																		6.33006	17.0425	6.37048	-1.43686	6.38944	4.45133	6.40458	0.947087	6.33072	11.5599	6.40319	4.71191	6.43255	1.92212	6.44771
110	Ductal carcinoma	16	0	0	0	0.7	3		x								2																		6.45329	52.9316	6.59112	25.511	6.679	14.9383	6.73555	9.03935	6.46495	50.5318	6.61318	26.3694	6.7122	14.7833	6.78079
[truncated: 1 more columns]
