# Supplementary material for: Acid-base transporters and pH dynamics in human breast carcinomas predict proliferative activity, metastasis, and survival
Source: eLife. 2021 Jul 5;10:e68447. doi: 10.7554/eLife.68447 (PMC8282339; doi:10.7554/eLife.68447)
Supplement: Figure 1—source data 1. — Note that this source data file pertains to Figure 1 but it also contains the clinicopathological information used for stratification in Figures 2–5, 7, and 8, and Figure 2—figure supplement 1; for the multiple linear and logistic regression analyses in Figure 6; and for the plots in Figure 6—figure supplement 1. [file elife-68447-fig1-data1.xlsx]

## Sheet: Ark1
																						Steady-state pHi		Net acid extrusion (mM/min) pHi 6.6		Steady-state pHi		Net acid extrusion (mM/min) pHi 6.5-6.6
No	Histological type	Tumor size (mm)	ER status (fraction of positive cells)	HER2 (0=normal, 1=overexpression/gene amplification)	Axillary lymph node status (0=negative, 1=metastasis detected)	Ki67 (fraction of positive cells)	Malignancy grade	Age (<45 years)	Age (45-49 years)	Age (50-54 years)	Age (55-59 years)	Age (60-64 years)	Age (65-69 years)	Age (70-74 years)	Age (75-79 years)	Age (>79 years)	Investigator		NHE1 expression level	NBCn1 expression level		Normal tissue with CO2/HCO3–	Normal tissue CO2/HCO3–-free	Normal tissue with CO2/HCO3–	Normal tissue CO2/HCO3–-free	Cancer tissue with CO2/HCO3–	Cancer tissue CO2/HCO3–-free	Cancer tissue with CO2/HCO3–	Cancer tissue CO2/HCO3–-free
1	Ductal carcinoma	22	1	0	1	0.1	1								x		1		5	4		6.87713	6.93821	36.0158	28.3804	7.21764	7.66353	29.8113	58.7394
2	Lobular carcinoma	19	1	0	0	0.02	1								x		1		2	2		7.32376	6.95685	50.3689	63.5348	7.4501	7.16929		5.73791
3	Ductal carcinoma	22	1	1	1	0.4	2									x	1		4	6		6.21257	6.19099	-13.3143	-47.7604	7.32275	6.72802	21.6245	-1.36921
4	Ductal carcinoma	12	1	1	1	0.1	1							x			1		4	4
5	Ductal carcinoma	18	1	1	0	0.2	1		x								1		5	3		7.40563	7.05032	43.9771	6.6443		6.68108		-1.11978
6	Lobular carcinoma	34	1	0	1	0.05	1						x				1		4	3		6.67491		-22.3196		7.35939	7.09659	45.8266	27.1865
7	Ductal carcinoma	20	0.02	0	0	0.9	3					x					1		5	5		7.23515	6.9735	13.6884	32.3042	7.90105	7.49243	19.7924	13.9291
8	Ductal carcinoma	9	1	0	0	0.2	1								x		1		4	2		7.45017	6.73693	35.2882	-15.1209	7.14703	7.20767	8.79175	20.2833
9	Ductal carcinoma	11	1	0	0	0.35	2			x							1		4	2		6.9153		-8.11883		7.74212	7.0297	18.2782	44.2349
10	Lobular carcinoma	18	1	0	0	0.2	1						x				1		5	2		7.10328	6.67181	64.962	-16.8627	7.56883	7.04426	35.7694	18.9798
11	Ductal carcinoma	20	1	0	0	0.2	1							x			1		4	2		7.07738		-2.60624		7.49938		45.2351
12	Mucinous adenocarcinoma	17	1	0	0	0.15										x	1		6	5		7.17702	7.0308	7.13941	-2.88049	7.87553	7.42337	23.0505	49.609
13	Lobular carcinoma	30	0.9	0	0	0.6	3								x		1		5	4		7.05827	6.77166	9.40553	-5.08834	7.31287	6.82484	24.0247	1.81979
14	Mucinous adenocarcinoma	19	1	0	0	0.15									x		1		6	5		7.39236	6.99066	94.3575	46.3326	7.38034	7.47768	13.6063	17.8231
15	Lobular carcinoma	15	1	1	0	0.1	2									x	1		4	3		7.06082	7.00193	12.3001	33.7961	7.8358	6.81043	54.3558	0.592432
16	Ductal carcinoma	17	1	0	0	0.25	2								x		1		5	3		7.19297	6.91241		37.4793	7.60707	7.38963	24.0835	15.3501
17	Ductal carcinoma	40	1	0	0	0.3	2				x						1		5	2		6.8863	7.0311	6.86444	17.8949	7.33623	6.87649	44.8038	3.97561
18	Ductal carcinoma	21	1	0	1	0.2	2							x			1		2	3
19	Tubulolobular carcinoma	27	1	0	1	0.15	1					x					1		6	5		6.62662	6.86576	-6.09087	25.4284	7.16538	7.31733	31.2405	10.0251
20	Lobular carcinoma	36	1	0	0	0.05	1		x								1		3	2		7.10069	6.81	44.9998	9.32841	7.47364	7.27855	30.1388	22.5291
21	Mucinous adenocarcinoma	16	1	0	0	0.05										x	1		6	3		6.84869	7.03425	42.4851	6.75202	7.33909	7.15742	17.4136	19.597
22	Ductal carcinoma	19	1	0	1	0.05	2						x				1		4	6		6.99027	6.93418	23.7656	22.6954	7.42673	7.08773	57.1876	55.4728
23	Ductal carcinoma	12	0	0	0	0.25	2				x						1		5	2		6.96582	6.715	16.8879	-24.8363	7.24466	7.23666	59.4476	25.8593
24	Ductal carcinoma	14	1	0	0	0.35	2					x					1		4	2		7.05274	6.91168	64.6035	46.8197
25	Ductal carcinoma	21	1	0	0	0.1	1							x			1		5	3		6.91837	6.88649	28.9648	21.8526	7.16349	7.15798	18.682	25.8424
26	Ductal carcinoma	15	1	0	1	0.25	2								x		1		6	3		7.05626	6.76102	40.4798	16.2693
27	Ductal carcinoma	17	1	0	1	0.15	1							x			1		6	1		6.75554	6.77745	-14.2247	6.1761	6.99103	7.30868	44.1986	17.1754
28	Ductal carcinoma	32	1	1	0	0.3	2					x					1		6	5						7.35448	7.11014	103.842	76.0026
29	Ductal carcinoma	23	1	0	0	0.05	2				x						1		5	3
30	Ductal carcinoma	13	1	0	0	0.05	2				x						1		6	3		6.94726	6.65305	-1.45303	-36.1956	7.15676	6.7953	7.79328	0.994923
31	Ductal carcinoma	15	1	0	0	0.05	2						x				1		1	3		7.07709	7.03775	45.9098	11.5217	7.04717	7.16094	34.6045	36.3188
32	Ductal carcinoma	10	0	0	0	0.9	3	x									1		5	2
33	Ductal carcinoma	30	0.9	0	1	0.2	2								x		1		5	3
34	Ductal carcinoma	14	1	1	0	0.25	2				x						1		6	2
35	Ductal carcinoma	21	1	0	0	0.35	1				x						1		4	4
36	Ductal carcinoma	17	1	0	0	0.1	2			x							1		5	3		7.19011	7.20446	91.592	34.316	7.04829	7.08632	12.8457	43.9742
37	Ductal carcinoma	20	0.03	0	0	0.9	3									x	1		3	5		6.83903	7.04166	14.1539	68.1514	7.0893	7.35115	29.1731	16.989
38	Ductal carcinoma	13	0.9	1	1	0.2	2					x					1		4	1
39	Ductal carcinoma	12	1	0	0	0.25	2								x		1		4	3			6.51608		-26.7429	7.36637	7.1884	18.4809	9.06053
40	Ductal carcinoma	12	1	0	0	0.15	2			x							1		5	3		7.00002	6.94818	17.0129	34.8385	7.22021	7.27725	15.2655	24.8817
41	Ductal carcinoma	17	1	1	0	0.1	2					x					1		6	3
42	Ductal carcinoma	14	1	0	0	0.1	1						x				1		4	1
43	Tubulolobular carcinoma	7	1	0	1	0.1					x						1		6
44	Ductal carcinoma	40	1	0	0	0.25	2									x	1		6	4
45	Lobular carcinoma	40	1	0	0	0.04	1						x				1		4	3
46	Ductal carcinoma	18	1	0	0	0.25	2	x									1		4	2		6.90241	6.78408	10.29	12.7229	7.25648	7.1511	11.765	24.4132
47	Ductal carcinoma	31	1	0	0	0.2	3							x			1		6	2		6.96257	6.60048	1.16559	-20.1904	7.3031	7.15388	36.8117	18.2543
48	Ductal carcinoma	48	1	0	0	0.5	3				x						1		6	6
49	Ductal carcinoma	23	0.95	0	1	0.25	2		x								1		6	5		6.80483		-5.59363		7.52858	7.21731	55.0561	24.947
50	Ductal carcinoma	7	1	0	0	0.3	2						x				1		6	2		6.70978	6.55839	1.66725	-28.3305	7.33622	7.26188	24.0364	20.8164
51	Ductal carcinoma	12	1	0	0	0.1	1				x						1		6	3
52	Ductal carcinoma	12	0.95	0	0	0.3	2						x				1		5	1			6.88319		22.8037
53	Ductal carcinoma	12	1	0	0	0.25	2					x					1		6	2		6.66812	6.6082	-8.83731	-19.8504	7.26193	7.1719	29.9202	23.6293
54	Ductal carcinoma	12	1	0	0	0.4	2						x				1		6	1		6.92422	6.87551	54.4041	43.5321	7.47485	7.21031	16.084	19.3034
55	Ductal carcinoma	9	0	0	0	0.9	3			x							1		6	1		6.87111	7.00275	31.5574	32.4214	7.47174	7.34184	34.4387	28.2976
56	Ductal carcinoma	29	1	0	1	0.2	2				x						1					6.75275	6.6126	5.95048	-16.4828	6.98971	6.83976	16.1853	6.85147
57	Ductal carcinoma	24	1	0	1	0.3	2				x						1		1	3		7.26132	7.12417	87.6861	43.326	7.20139	7.28152	27.9395	19.4536
58	Ductal carcinoma	28	1	1	1	0.5	3				x						1		6	4		6.82739	6.71169	-9.32119	0.106526	7.44512	7.10355	14.59	20.7288
59	Ductal carcinoma	14	1	0	0	0.1	1					x					1		5	3		6.79321	6.75959	-0.280694	-11.08	7.25138	7.51745	39.8078
60	Ductal carcinoma	21	1	0	1	0.3	2				x						1		1	2
61	Ductal carcinoma	23	0	0	0	0.7	3			x							1		6	3
62	Ductal carcinoma	15	1	1	0	0.4	3	x									1		6	4		6.79257	6.71511	-13.8543	-2.55613	7.60043	7.21364	18.9893	11.2942
63	Ductal carcinoma	12	1	0	0	0.2	3							x			1		4	2
64	Ductal carcinoma	14	0.15	1	1	0.6	3				x						1		6	5
65	Ductal carcinoma	20	1	0	1	0.8	3							x			1		4	3
66	Ductal carcinoma	100	1	0	1	0.1	2									x	1		6	2		7.06149	6.65168	32.3279	-8.76798	7.24992	7.47363	16.7931
67	Mucinous adenocarcinoma	17	0.1	0	0	0.2								x			1		5	2		6.67189	6.77072	-24.2581	-1.55644	7.44324	7.02576	17.9335	6.63393
68	Ductal carcinoma	15	1	0	0	0.05	1					x					1		6	3		6.74257	6.86368	17.2696	14.7882		6.98394		38.5007
69	Ductal carcinoma	14	1	0	0	0.15	2			x							1		6	3
70	Ductal carcinoma	40	0.95	0	0	0.2	2						x				1		5	3		6.81048	6.76451	6.31289	2.59551	7.34868	7.18747	45.2736	26.6153
71	Ductal carcinoma	25	1	1	1	0.3	2				x						1		6	6		6.90474	6.85505	7.3667	0.106526	7.11871	7.46747	30.8937	41.3745
72	Ductal carcinoma	18	1	0	0	0.1	2							x			1		6	3			7.17953			7.29049	7.04212	33.2943	20.7496
73	Ductal carcinoma	16	1	1	0	0.6	3	x									1		6	4		6.87991	6.94876	17.7574	38.9562	7.39028	7.34966	43.1616	50.785
74	Ductal carcinoma	50	1	0	1	0.35	2		x								1		1	6		7.03419	7.08	74.9678	26.5048	7.36422	6.92724	39.9233	10.7355
75	Ductal carcinoma	12	1	0	1	0.1	1							x			1		6	4
76	Ductal carcinoma	18	1	0	0	0.1	1							x			1		5	3						7.56164	7.08007	32.0553	20.2998
77	Ductal carcinoma	15	0.95	0	1	0.15	2	x									1		3	4		7.22158	7.00429	61.0605	13.349	7.19542	7.40764	61.4896	21.7062
78	Ductal carcinoma	15	0.95	0	1	0.1	1						x				1		5	5
79	Ductal carcinoma	42	1	0	1	0.25	2								x		1		3	2
80	Lobular carcinoma	45	0.95	0	1	0.4	2								x		1		5	2
81	Ductal carcinoma	27	0	0	0	0.2	2									x	2									7.42682	6.98559		5.99563
82	Ductal carcinoma	21	1	0	1	0.4	3								x		2									7.347	7.13289	38.4872	4.94621
83	Ductal carcinoma	23	0	0	1	0.2	3					x					2									7.48486	7.15269	51.04
84	Ductal carcinoma	34	0.9	1	0	0.4	2								x		2									7.24019	6.97021	41.1193	16.054
85	Ductal carcinoma	15	0.95	1	0	0.4	3				x						2									7.44916	6.88676		25.6334
86	Ductal carcinoma	30	1	0	0	0.5	3								x		2									7.02989	6.91576	5.27169	27.0406
87	Lobular carcinoma	50	1	0	0	0.15	1						x				2									7.07363	6.935	19.883	29.6214
88	Ductal carcinoma	25	1	0	1	0.15	1				x						2									7.22903	7.33508	44.784
89	Ductal carcinoma	30	1	0	0	0.1	1			x							2									7.21274	7.24936	21.2846
90	Ductal carcinoma	7	1	0	1	0.25	1							x			2									7.13221	6.66826	46.2209	-9.75067
91	Lobular carcinoma	44	1	0	1	0.1	2								x		2									7.07208	6.7433	74.899	17.9925
92	Ductal carcinoma	16	1	0	1	0.15	2					x					2									6.96207	6.69432	51.7862	7.70457
93	Ductal carcinoma	27	0.9	0	1	0.4	1		x								2									7.21268	6.97138	27.2398	25.6583
94	Ductal carcinoma	12	1	0	0	0.15	2		x								2									6.74925	6.61506	7.08396	-5.50557
95	Ductal carcinoma	14	0.95	1	0	0.2	1							x			2									6.83146	6.80258	3.64753	29.3619
96	Ductal carcinoma	26	1	0	1	0.2	1				x						2									7.00926	6.77202	30.1961	3.60157
97	Ductal carcinoma	14	1	0	1	0.2	1				x						2									6.6557	6.8203	12.2501	15.4643
98	Ductal carcinoma	15	1	0	1	0.85	3							x			2									7.04532	6.43908	22.9978	3.86643
99	Ductal carcinoma	21	0.95	0	1	0.4	3	x									2									7.11728	6.7925	61.2549	36.2945
100	Ductal carcinoma	22	1	0	1	0.3	2					x					2									7.01544	6.96148	32.7815	7.12111
101	Ductal carcinoma	25	0.95	0	1	0.1	2			x							2									7.12704	7.08714	68.7786	35.8354
102	Ductal carcinoma	26	1	0	1	0.2	2	x									2									7.15876	6.69228	16.7812	13.2051
103	Ductal carcinoma	19	0.95	0	1	0.2	2						x				2									7.00439	6.5909	36.4085	-3.67762
104	Ductal carcinoma	14	1	0	0	0.6	3						x				2									7.03331	6.86467	108.95	48.1002
105	Ductal carcinoma	17	1	0	0	0.2	2				x						2
106	Lobular carcinoma	18	1	0	0	0.05	1									x	2									6.93025	6.84445	30.2475	17.291
107	Mucinous adenocarcinoma	26	1	0	0	0.2	1			x							2									7.01068	6.80778	80.3923	17.6014
108	Ductal carcinoma	30	1	0	0	0.2	2								x		2									6.81851	6.63078	17.3735	-4.57299
109	Ductal carcinoma	14	1	0	0	0.3	2								x		2									6.86582	6.40904	-20.6423	-4.02824
110	Ductal carcinoma	16	0	0	0	0.7	3		x								2									6.96111	6.81272	43.5598	44.1832
