# Supplementary figures and images for: Acid-base transporters and pH dynamics in human breast carcinomas predict proliferative activity, metastasis, and survival
Source: eLife journal article supplement (doi:10.7554/elife.68447), 2021-07-05

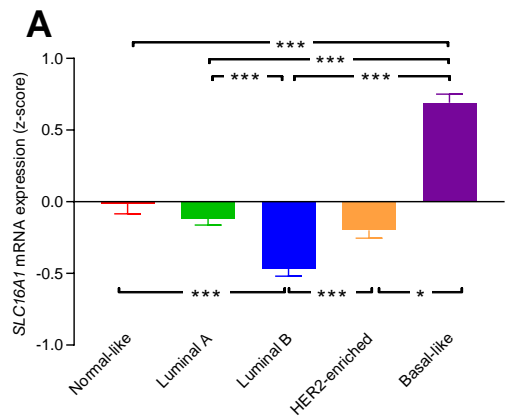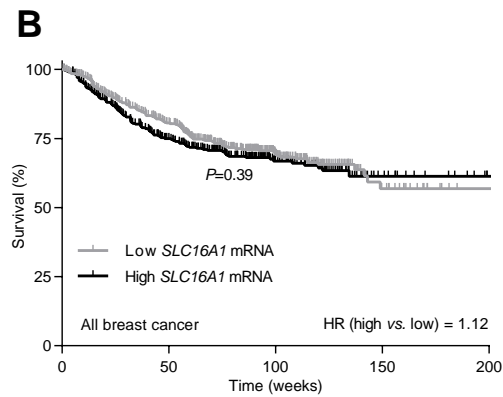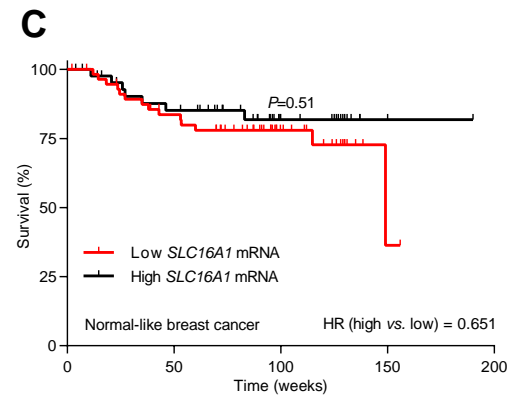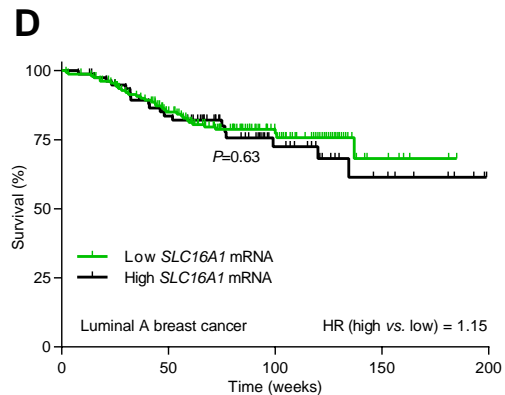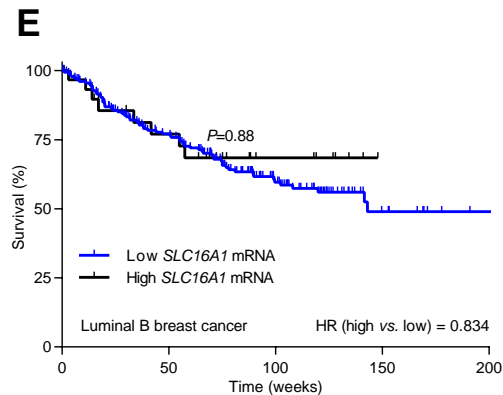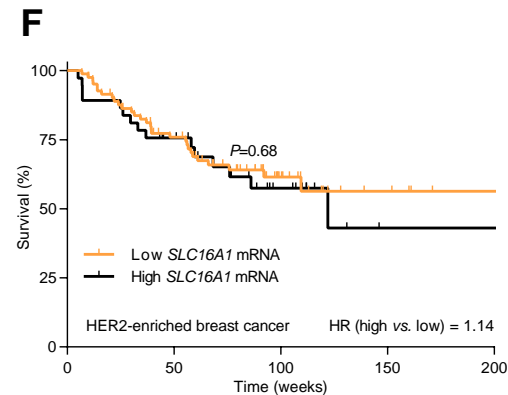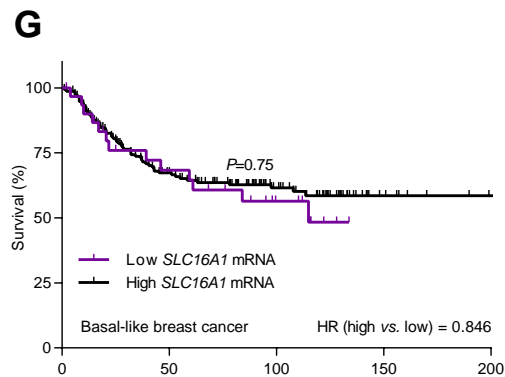

Supplement: supp [file elife_poa_e68447_Figure_10_figure_supplement_1.pdf › elife_poa_e68447_Figure_10_figure_supplement_1.pdf]

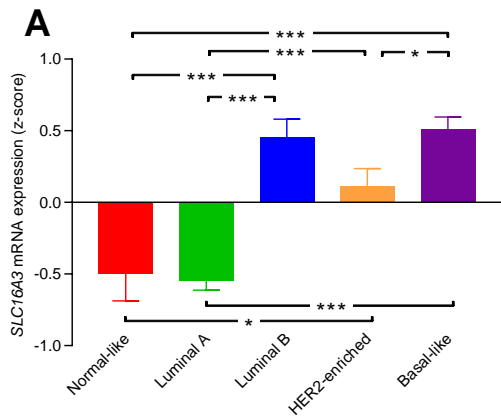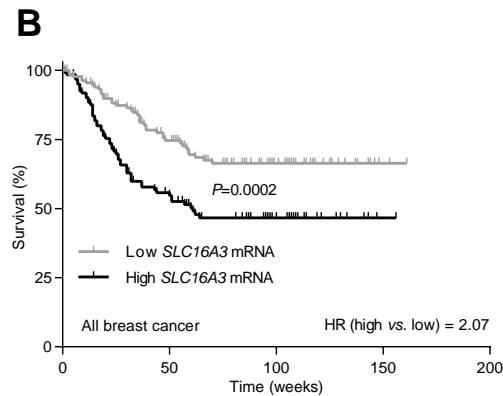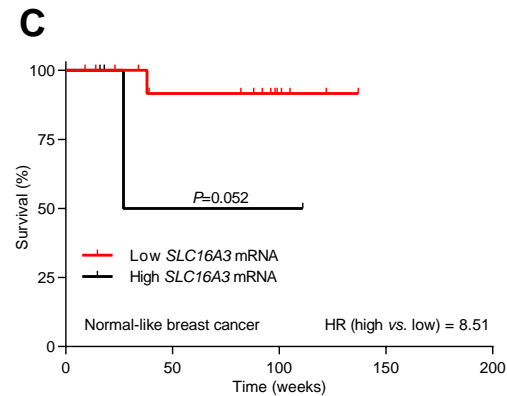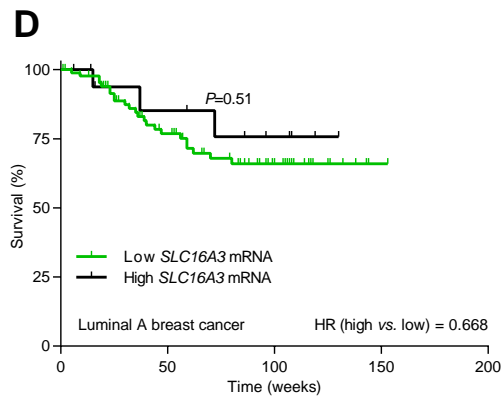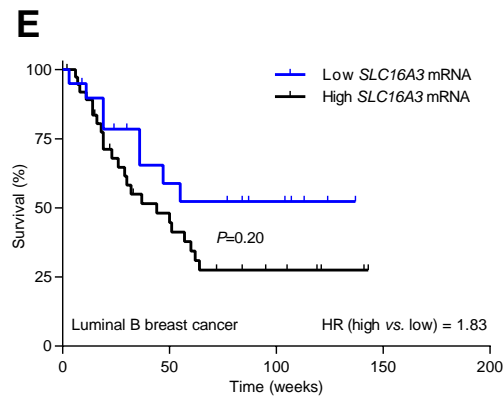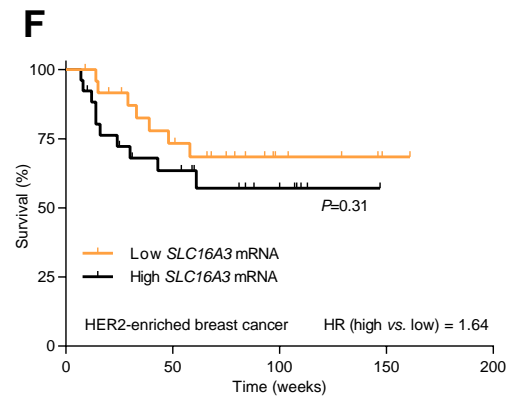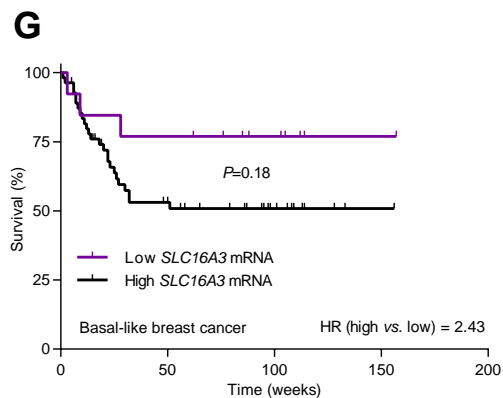

Supplement: supp [file elife_poa_e68447_Figure_10_figure_supplement_2.pdf › elife_poa_e68447_Figure_10_figure_supplement_2.pdf]

**A**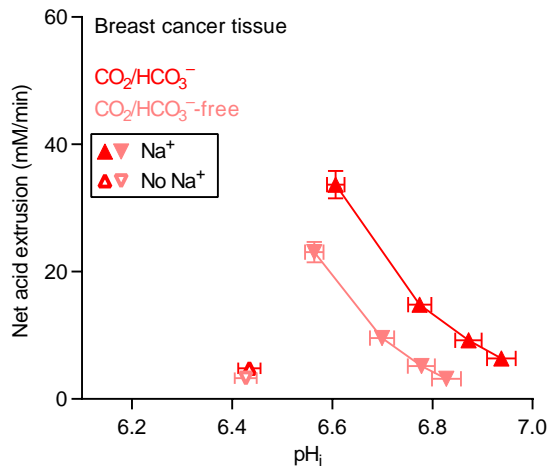**B**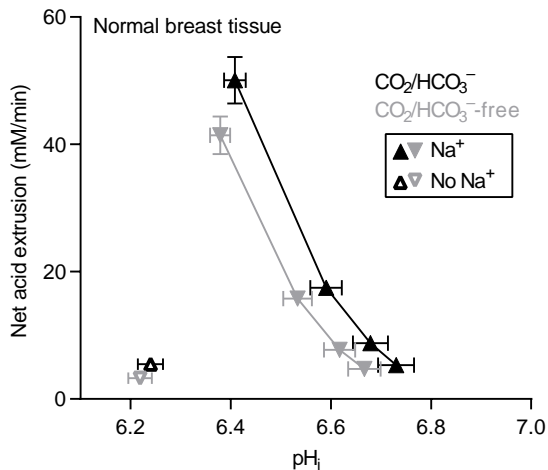

Supplement: supp [file elife_poa_e68447_Figure_1_figure_supplement_1.pdf › elife_poa_e68447_Figure_1_figure_supplement_1.pdf]

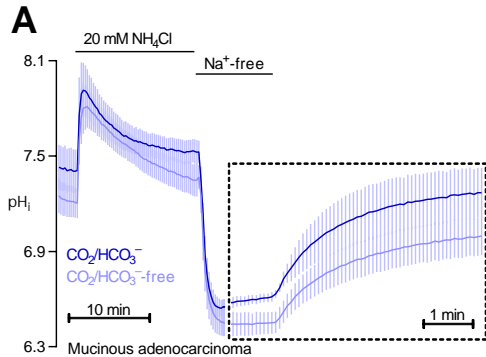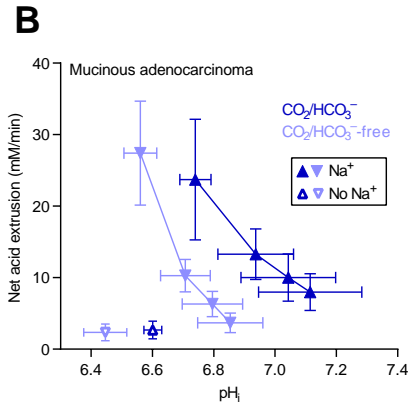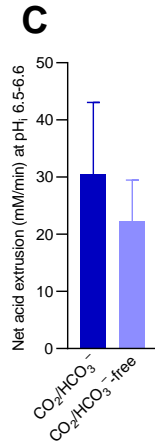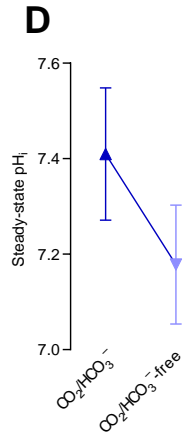

Supplement: supp [file elife_poa_e68447_Figure_2_figure_supplement_1.pdf › elife_poa_e68447_Figure_2_figure_supplement_1.pdf]

**A**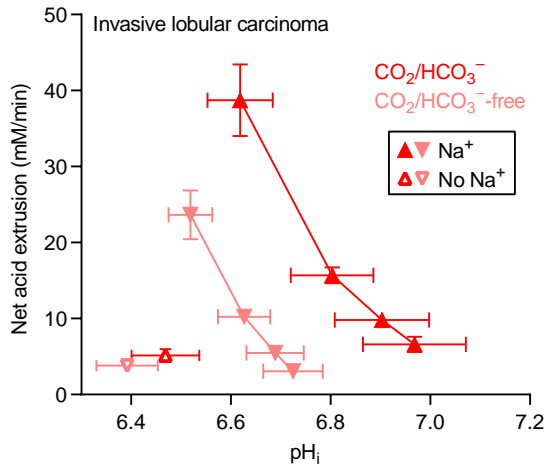**B**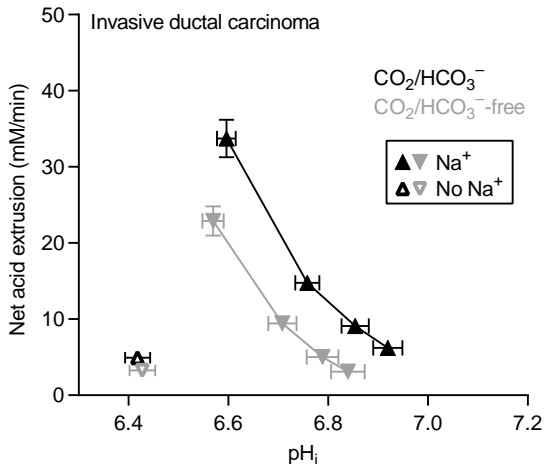

Supplement: supp [file elife_poa_e68447_Figure_2_figure_supplement_2.pdf › elife_poa_e68447_Figure_2_figure_supplement_2.pdf]

**A**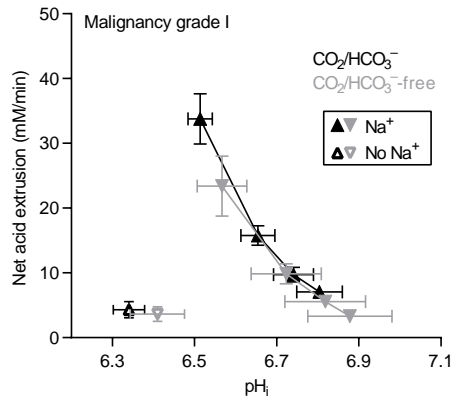**B**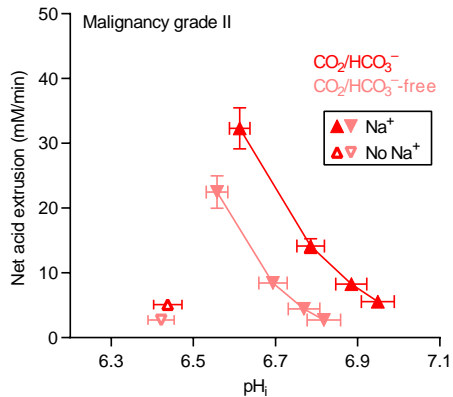**C**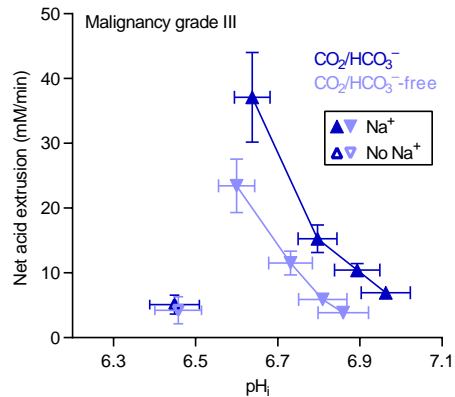

Supplement: supp [file elife_poa_e68447_Figure_3_figure_supplement_1.pdf › elife_poa_e68447_Figure_3_figure_supplement_1.pdf]

**A**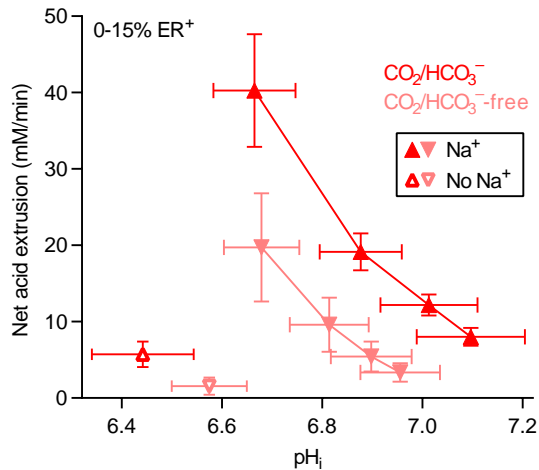**B**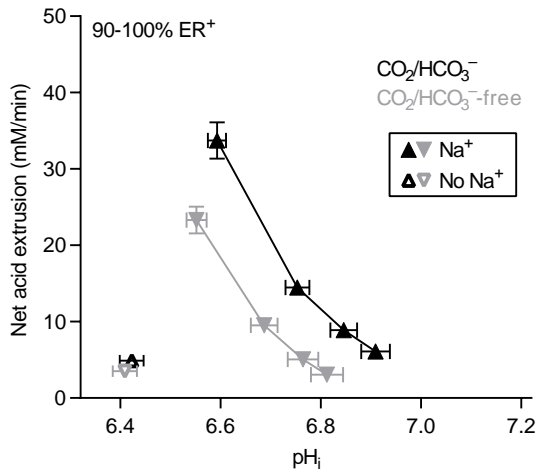

Supplement: supp [file elife_poa_e68447_Figure_4_figure_supplement_1.pdf › elife_poa_e68447_Figure_4_figure_supplement_1.pdf]

**A**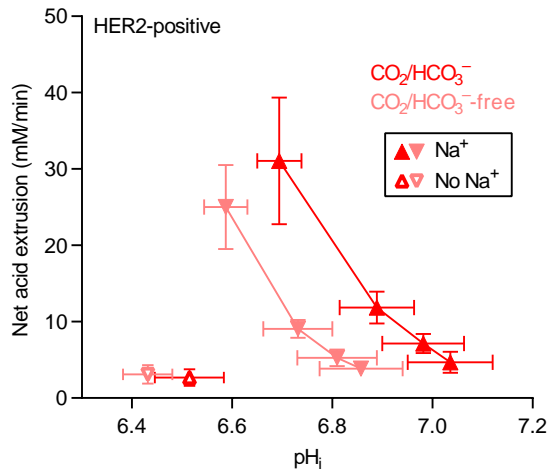**B**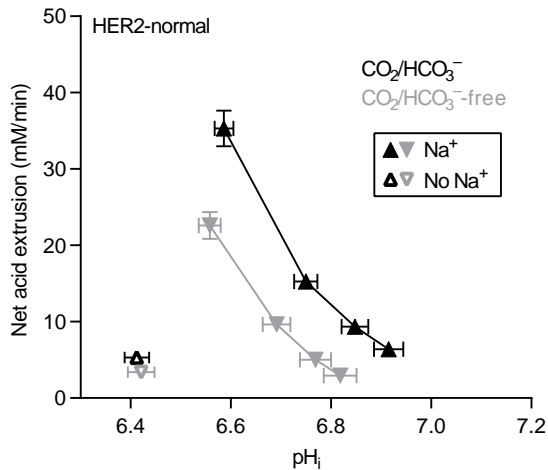

Supplement: supp [file elife_poa_e68447_Figure_5_figure_supplement_1.pdf › elife_poa_e68447_Figure_5_figure_supplement_1.pdf]

**A**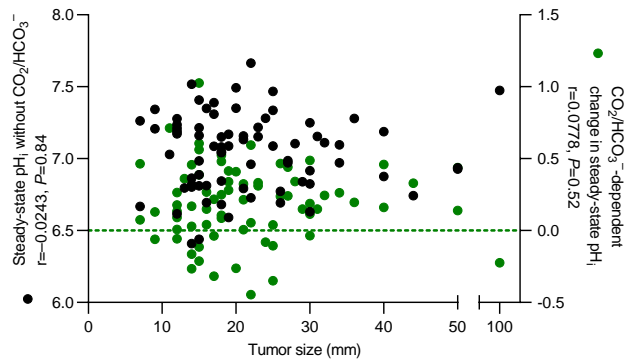**B**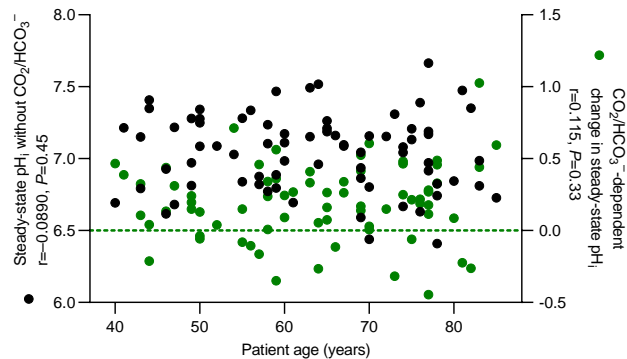**C**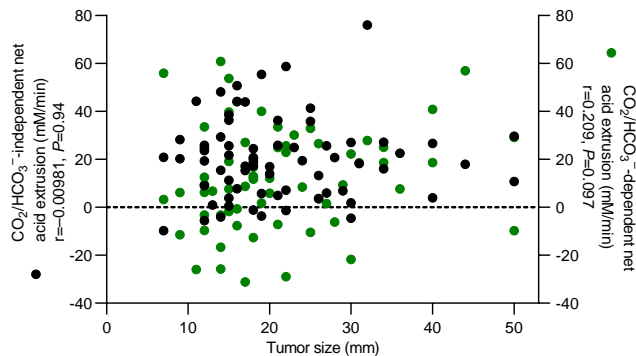**D**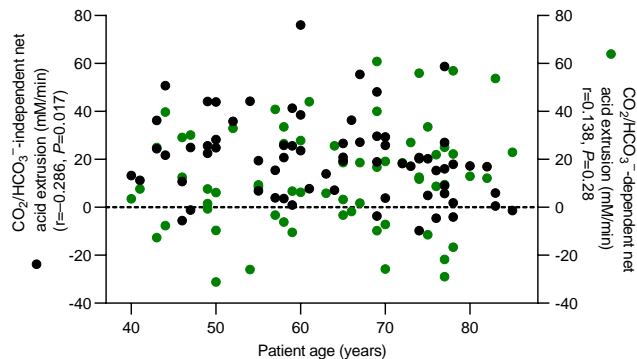

Supplement: supp [file elife_poa_e68447_Figure_6_figure_supplement_1.pdf › elife_poa_e68447_Figure_6_figure_supplement_1.pdf]

**A**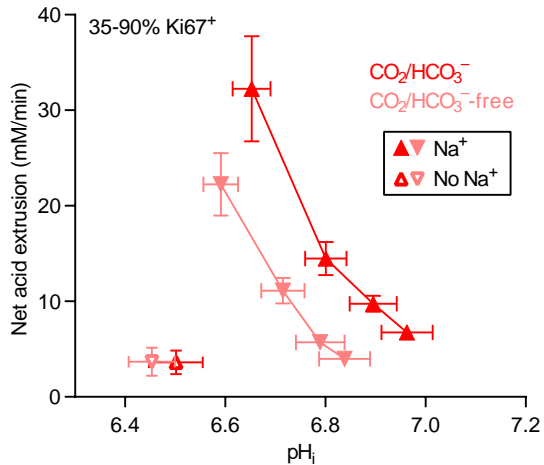**B**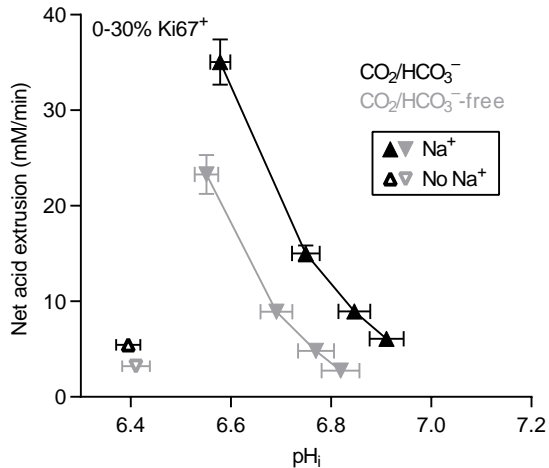

Supplement: supp [file elife_poa_e68447_Figure_7_figure_supplement_1.pdf › elife_poa_e68447_Figure_7_figure_supplement_1.pdf]

**A**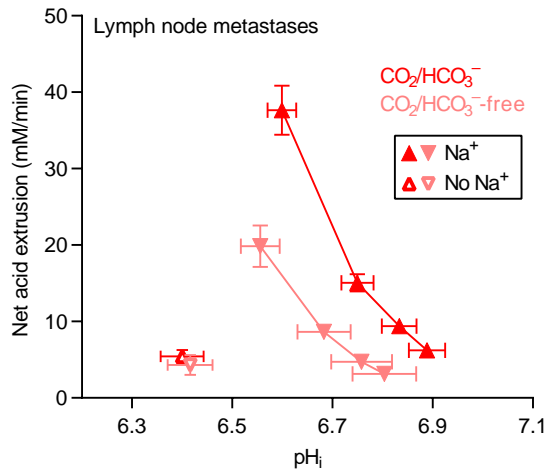**B**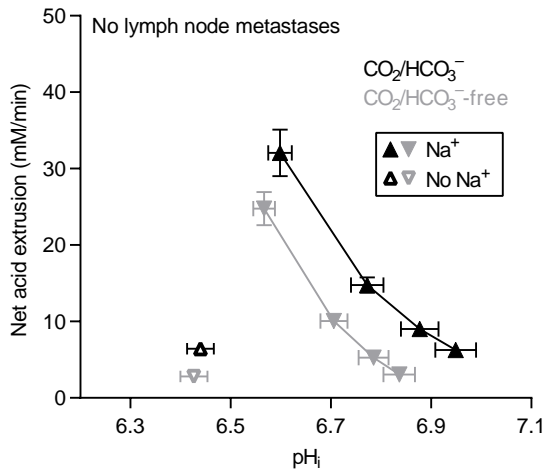

Supplement: supp [file elife_poa_e68447_Figure_8_figure_supplement_1.pdf › elife_poa_e68447_Figure_8_figure_supplement_1.pdf]

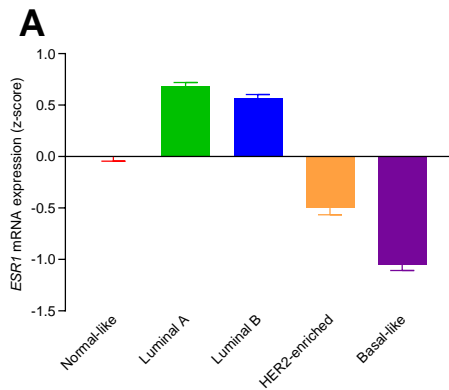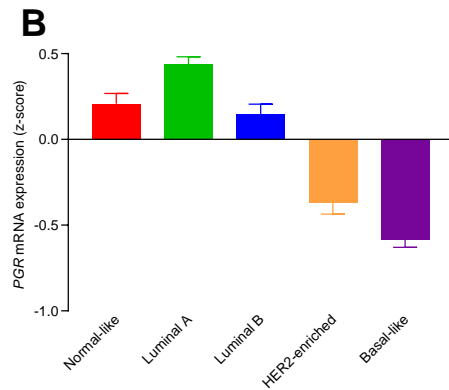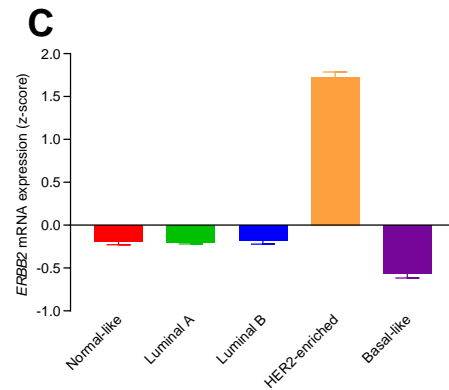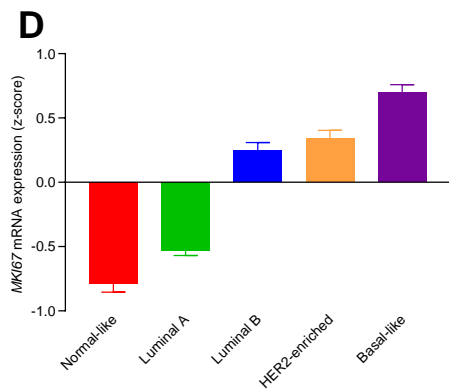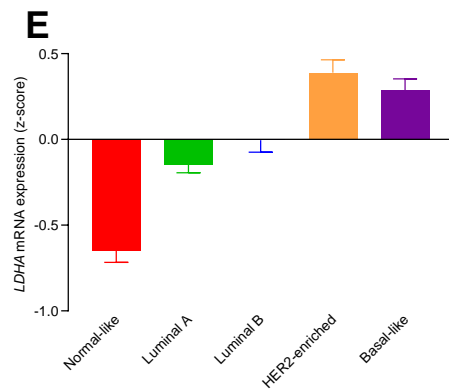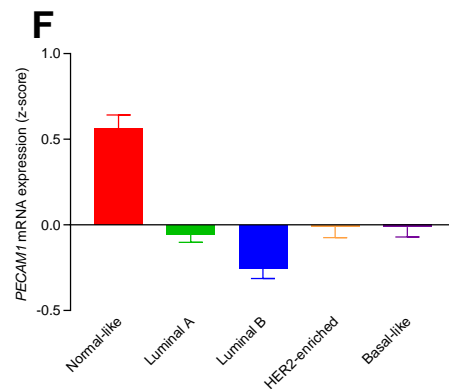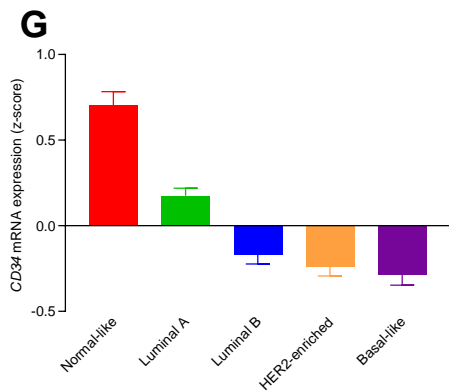

Supplement: supp [file elife_poa_e68447_Figure_9_figure_supplement_1.pdf › elife_poa_e68447_Figure_9_figure_supplement_1.pdf]
